# Supplementary material for: Caenorhabditis elegans PAQR-2 and IGLR-2 Protect against Glucose Toxicity by Modulating Membrane Lipid Composition
Source: PubMed Central journal article supplement (PMC4833288; doi:10.1371/journal.pgen.1005982), 2016-04-15
Supplement: pgen.1005982.s006.pdf [file pgen.1005982.s006.pdf]

**Table S1:** FA composition in PC (mol%)

|            | N2         | <i>paqr-2(tm3410)</i> | <i>paqr-2(et35)</i> | <i>paqr-2(et36)</i> | <i>iglr-2(et34)</i> | <i>iglr-2(et37)</i> | <i>iglr-2(et38)</i> | <i>paqr-2(tm3410) iglr-2(et34)</i> |
|------------|------------|-----------------------|---------------------|---------------------|---------------------|---------------------|---------------------|------------------------------------|
| PC FA 14:0 | 0.12±0.01  | 0.18±0.01***          | 0.16±0.01**         | 0.14±0.01           | 0.16±0.01**         | 0.15±0.01*          | 0.16±0.02           | 0.18±0.01***                       |
| PC FA 15:0 | 1.72±0.05  | 1.82±0.04             | 1.82±0.02           | 1.79±0.02           | 1.70±0.04           | 1.93±0.03**         | 1.80±0.06           | 1.69±0.07                          |
| PC FA 16:0 | 0.98±0.03  | 1.31±0.05***          | 1.12±0.02**         | 1.15±0.05*          | 1.25±0.07**         | 1.22±0.07*          | 1.05±0.02           | 1.17±0.03**                        |
| PC FA 17:0 | 2.74±0.07  | 2.29±0.05***          | 2.66±0.05           | 2.74±0.03           | 2.44±0.08*          | 2.77±0.04           | 2.73±0.10           | 2.10±0.03***                       |
| PC FA 18:0 | 1.54±0.08  | 1.87±0.12*            | 1.59±0.02           | 1.57±0.10           | 1.60±0.10           | 1.87±0.11*          | 1.62±0.06           | 1.72±0.16                          |
| PC FA 19:0 | 0.09±0.01  | 0.07±0.00             | 0.07±0.00*          | 0.09±0.01           | 0.08±0.01           | 0.09±0.00           | 0.09±0.01           | 0.07±0.01                          |
| PC FA 16:1 | 2.19±0.05  | 2.55±0.02***          | 2.57±0.05***        | 2.15±0.03           | 2.92±0.10***        | 2.32±0.08           | 2.22±0.08           | 2.96±0.09***                       |
| PC FA 17:1 | 6.81±0.05  | 6.68±0.10             | 6.19±0.18**         | 6.97±0.15           | 6.69±0.08           | 6.60±0.10           | 6.79±0.12           | 6.68±0.18                          |
| PC FA 18:1 | 30.29±0.29 | 30.48±0.25            | 30.80±0.46          | 31.24±0.19*         | 32.36±0.15***       | 30.71±0.25          | 29.97±0.61          | 30.93±0.54                         |
| PC FA 19:1 | 2.67±0.04  | 1.64±0.03***          | 2.12±0.08***        | 2.49±0.03**         | 1.90±0.05***        | 2.17±0.05***        | 2.64±0.07           | 1.57±0.05***                       |
| PC FA 20:1 | 0.34±0.01  | 0.25±0.00***          | 0.29±0.02*          | 0.31±0.00**         | 0.26±0.01***        | 0.28±0.00***        | 0.33±0.01           | 0.25±0.01***                       |
| PC FA 16:2 | 0.33±0.01  | 0.37±0.01**           | 0.39±0.01**         | 0.36±0.01*          | 0.48±0.02***        | 0.38±0.01*          | 0.37±0.01*          | 0.43±0.02**                        |
| PC FA 18:2 | 7.47±0.27  | 5.78±0.16***          | 6.07±0.03***        | 6.08±0.13**         | 5.25±0.15***        | 5.28±0.22***        | 5.10±0.06***        | 6.66±0.17*                         |
| PC FA 18:3 | 3.72±0.07  | 4.60±0.03***          | 4.36±0.04***        | 3.78±0.06           | 4.78±0.05***        | 4.22±0.07***        | 4.15±0.07**         | 4.94±0.08***                       |
| PC FA 20:2 | 0.32±0.01  | 0.30±0.01             | 0.33±0.02           | 0.30±0.02           | 0.26±0.01**         | 0.27±0.02           | 0.32±0.01           | 0.31±0.02                          |
| PC FA 20:3 | 4.13±0.04  | 4.67±0.09***          | 4.47±0.05***        | 4.07±0.07           | 4.27±0.04*          | 4.49±0.08**         | 4.51±0.15*          | 4.64±0.15*                         |
| PC FA 20:4 | 8.46±0.08  | 8.79±0.16             | 8.94±0.17*          | 8.43±0.21           | 8.40±0.10           | 9.21±0.08***        | 9.01±0.30           | 8.83±0.26                          |
| PC FA 20:5 | 26.08±0.43 | 26.35±0.26            | 26.04±0.23          | 26.35±0.08          | 25.18±0.27          | 26.04±0.31          | 27.13±0.52          | 24.85±0.35                         |

\*p&lt;0.05, \*\*p&lt;0.01, \*\*\*p&lt;0.001
