# Supplementary material for: Caenorhabditis elegans PAQR-2 and IGLR-2 Protect against Glucose Toxicity by Modulating Membrane Lipid Composition
Source: PubMed Central journal article supplement (PMC4833288; doi:10.1371/journal.pgen.1005982), 2016-04-15
Supplement: pgen.1005982.s007.pdf [file pgen.1005982.s007.pdf]

**Table S2:** FA composition in PE (mol%)

|            | N2         | <i>paqr-2(tm3410)</i> | <i>paqr-2(et35)</i> | <i>paqr-2(et36)</i> | <i>iglr-2(et34)</i> | <i>iglr-2(et37)</i> | <i>iglr-2(et38)</i> | <i>paqr-2(tm3410) iglr-2(et34)</i> |
|------------|------------|-----------------------|---------------------|---------------------|---------------------|---------------------|---------------------|------------------------------------|
| PE FA 14:0 | 0.02±0.00  | 0.03±0.00*            | 0.02±0.00           | 0.02±0.00           | 0.03±0.00*          | 0.02±0.00           | 0.02±0.00           | 0.02±0.00                          |
| PE FA 15:0 | 0.90±0.02  | 1.36±0.01***          | 1.17±0.04***        | 1.11±0.03***        | 1.14±0.02***        | 1.18±0.01***        | 1.17±0.01***        | 1.21±0.03***                       |
| PE FA 16:0 | 1.98±0.05  | 3.58±0.05***          | 3.08±0.04***        | 2.61±0.04***        | 3.53±0.11***        | 3.22±0.10***        | 2.97±0.05***        | 3.75±0.05***                       |
| PE FA 17:0 | 4.52±0.08  | 5.82±0.10***          | 5.83±0.08***        | 5.60±0.08***        | 5.76±0.05***        | 5.76±0.08***        | 5.93±0.08***        | 5.38±0.07***                       |
| PE FA 18:0 | 3.71±0.03  | 4.65±0.12***          | 4.42±0.06***        | 4.35±0.05***        | 4.62±0.17***        | 4.96±0.12***        | 4.40±0.08***        | 4.56±0.05***                       |
| PE FA 19:0 | 0.33±0.01  | 0.29±0.01             | 0.29±0.00           | 0.34±0.00           | 0.32±0.01           | 0.32±0.01           | 0.31±0.01           | 0.30±0.01                          |
| PE FA 20:0 | 0.29±0.01  | 0.27±0.00**           | 0.32±0.01*          | 0.32±0.01*          | 0.30±0.01           | 0.31±0.01*          | 0.31±0.00           | 0.31±0.01                          |
| PE FA 16:1 | 1.92±0.06  | 2.04±0.02             | 1.94±0.02           | 1.79±0.03           | 2.20±0.10*          | 1.80±0.03           | 1.87±0.04           | 2.30±0.03***                       |
| PE FA 17:1 | 8.24±0.09  | 7.15±0.09***          | 6.39±0.23***        | 7.66±0.10**         | 7.34±0.13***        | 6.78±0.09***        | 7.30±0.24**         | 7.38±0.22**                        |
| PE FA 18:1 | 52.13±0.35 | 51.42±0.21            | 54.07±0.20**        | 54.39±0.27***       | 53.50±0.36*         | 54.04±0.26**        | 53.94±0.26**        | 52.46±0.17                         |
| PE FA 19:1 | 2.17±0.06  | 1.78±0.03***          | 1.84±0.06**         | 2.08±0.03           | 1.85±0.04**         | 1.90±0.04**         | 2.07±0.04           | 1.66±0.04***                       |
| PE FA 20:1 | 0.78±0.02  | 0.78±0.01             | 0.89±0.01**         | 0.89±0.01***        | 0.82±0.01           | 0.84±0.01*          | 0.88±0.02**         | 0.70±0.01**                        |
| PE FA 16:2 | 0.16±0.01  | 0.17±0.02             | 0.17±0.01           | 0.16±0.01           | 0.20±0.01*          | 0.16±0.01           | 0.16±0.00           | 0.18±0.01                          |
| PE FA 18:2 | 8.36±0.19  | 7.77±0.19             | 7.19±0.07***        | 6.30±0.13***        | 6.63±0.16***        | 6.23±0.20***        | 6.29±0.07***        | 7.99±0.21                          |
| PE FA 18:3 | 1.79±0.03  | 1.95±0.03*            | 1.71±0.02           | 1.56±0.02***        | 1.86±0.01           | 1.61±0.03**         | 1.65±0.02**         | 1.92±0.03*                         |
| PE FA 20:2 | 0.65±0.02  | 0.61±0.02             | 0.68±0.00           | 0.55±0.01**         | 0.55±0.03*          | 0.55±0.03*          | 0.64±0.02           | 0.63±0.01                          |
| PE FA 20:3 | 2.71±0.03  | 2.88±0.08             | 2.53±0.02**         | 2.30±0.02***        | 2.40±0.05**         | 2.52±0.04*          | 2.54±0.01**         | 2.43±0.06**                        |
| PE FA 20:4 | 3.51±0.07  | 3.05±0.09**           | 2.84±0.03***        | 2.88±0.04***        | 2.66±0.04***        | 2.99±0.08**         | 2.94±0.02***        | 2.67±0.03***                       |
| PE FA 20:5 | 5.82±0.11  | 4.42±0.14***          | 4.61±0.05***        | 5.08±0.09***        | 4.32±0.10***        | 4.80±0.06***        | 4.60±0.11***        | 4.16±0.07***                       |

\*p&lt;0.05, \*\*p&lt;0.01, \*\*\*p&lt;0.001
